# Supplementary material for: Basic domain of telomere guardian TRF2 reduces D-loop unwinding whereas Rap1 restores it
Source: PubMed Central journal article supplement — Nucleic Acids Res. 2017 Sep 13;45(21):12170–80. doi: 10.1093/nar/gkx812 (PMC5716094; doi:10.1093/nar/gkx812), 2017-09-13
Supplement: gkx812_supp.pdf [file gkx812_supp.pdf]

## SUPPLEMENTARY INFORMATION

**Content:** Supplementary Tables S1, S2, Supplementary Figures S1, S2, S3

**Table S1:** The dependence of association constants for TRF2 or  $\Delta^B$ TRF2 binding to telomeric R2 DNA duplex on salt concentration

| TRF2 -> DNA-R2 |               |                           |                            |           |                                               |                 |     |
|----------------|---------------|---------------------------|----------------------------|-----------|-----------------------------------------------|-----------------|-----|
| [NaCl]<br>mM   | Log<br>[NaCl] | Aver. Value<br>$K_d$ (nM) | $K_a$<br>( $10^6 M^{-1}$ ) | Log $K_a$ | $\Delta \log K_a / \Delta \log [\text{NaCl}]$ | Log $K_a^{nel}$ | Z   |
| 50             | -1.30         | 30                        | 33.3                       | 7.3       |                                               |                 |     |
| 70             | -1.15         | 66                        | 15.1                       | 6.9       |                                               |                 |     |
| 100            | -1.00         | 180                       | 5.6                        | 6.4       | -3.0                                          | 3.7             | 4.6 |
| 140            | -0.85         | 595                       | 1.7                        | 6.0       |                                               |                 |     |

  

| $\Delta^B$ TRF2 -> DNA-R2 |               |                           |                            |           |                                               |                 |     |
|---------------------------|---------------|---------------------------|----------------------------|-----------|-----------------------------------------------|-----------------|-----|
| [NaCl]<br>mM              | Log<br>[NaCl] | Aver. value<br>$K_d$ (nM) | $K_a$<br>( $10^6 M^{-1}$ ) | Log $K_a$ | $\Delta \log K_a / \Delta \log [\text{NaCl}]$ | Log $K_a^{nel}$ | Z   |
| 50                        | -1.30         | 69                        | 14.5                       | 6.9       |                                               |                 |     |
| 70                        | -1.15         | 108                       | 9.3                        | 6.7       |                                               |                 |     |
| 100                       | -1.00         | 176                       | 5.7                        | 6.5       | -2.2                                          | 4.4             | 3.4 |
| 140                       | -0.85         | 735                       | 1.4                        | 5.8       |                                               |                 |     |

**Table S2:** Contributions of electrostatic  $\Delta G^{el}$  and non-electrostatic  $\Delta G^{nel}$  component to the total free energy for TRF2 binding to DNA duplex R2.

|                                          | TRF2 -> DNA-R2 |                                          | $\Delta^B$ TRF2 -> DNA-R2 |
|------------------------------------------|----------------|------------------------------------------|---------------------------|
| $\Delta G$ [kJ mol <sup>-1</sup> ]       | -42.9          | $\Delta G$ [kJ mol <sup>-1</sup> ]       | -40.8                     |
| $\Delta G^{nel}$ [kJ mol <sup>-1</sup> ] | -21.3          | $\Delta G^{nel}$ [kJ mol <sup>-1</sup> ] | -25.0                     |
| $\Delta G^{el}$ [kJ mol <sup>-1</sup> ]  | -21.6          | $\Delta G^{el}$ [kJ mol <sup>-1</sup> ]  | -15.8                     |

The relative standard errors of all presented mean values were less than 3%.

**Table S3:** SAXS derived parameters for the B-domain free in solution and in complex with DNA duplex R2

| <b>Data collection parameters</b>       | B-domain | DNA-R2       | complex |
|-----------------------------------------|----------|--------------|---------|
| Wavelength [Å]                          |          | 1.5418       |         |
| q range [Å <sup>-1</sup> ]              |          | 0.008 – 0.65 |         |
| Exposure time [min]                     |          | 60           |         |
| Temperature [C°]                        |          | 4            |         |
| <b>Structural parameters</b>            |          |              |         |
| Rg [Å] (from Guinier)                   | 16.48    | 14.89        | 16.83   |
| Rg [Å] (from P (r))                     | 18.39    | 16.45        | 17.64   |
| D max [Å]                               | 77.65    | 53.18        | 57.66   |
| Porod volume estimate [Å <sup>3</sup> ] | 4310     | 13520        | 18530   |

The relative standard errors of all presented mean values were less than 5%.

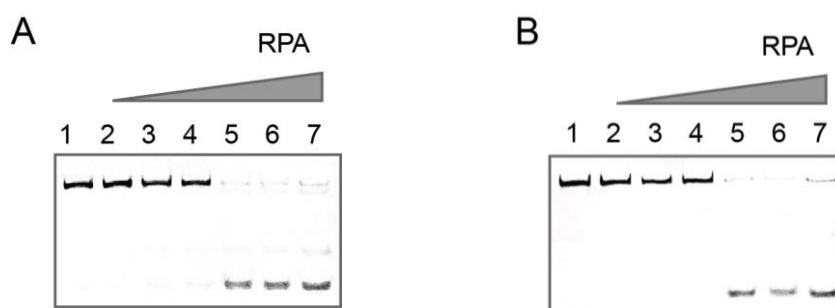

**Figure S1. RPA does not unwind D-loops at concentrations used in BLM unwinding experiments.**

Increasing amounts of RPA were incubated with constant amount of D-loops (3 nM) for 20 min at 37°C. The concentration of RPA in nM was 0, 44, 88, 175, 350, 700, 1400 in lanes 1, 2, 3, 4, 5, 6, and 7, respectively. D-loop R4 containing four telomeric repeats (**A**) or non-telomeric D-loop N (**B**) after incubation with RPA in reaction buffer (25 mM Tris-acetate, pH 7.5, 5 mM CaCl<sub>2</sub>, 2 mM MgCl<sub>2</sub>, 5 mM ATP, 5 mM DTT and 100 µg/ml BSA) was separated on a vertical 10% native polyacrylamide gel.

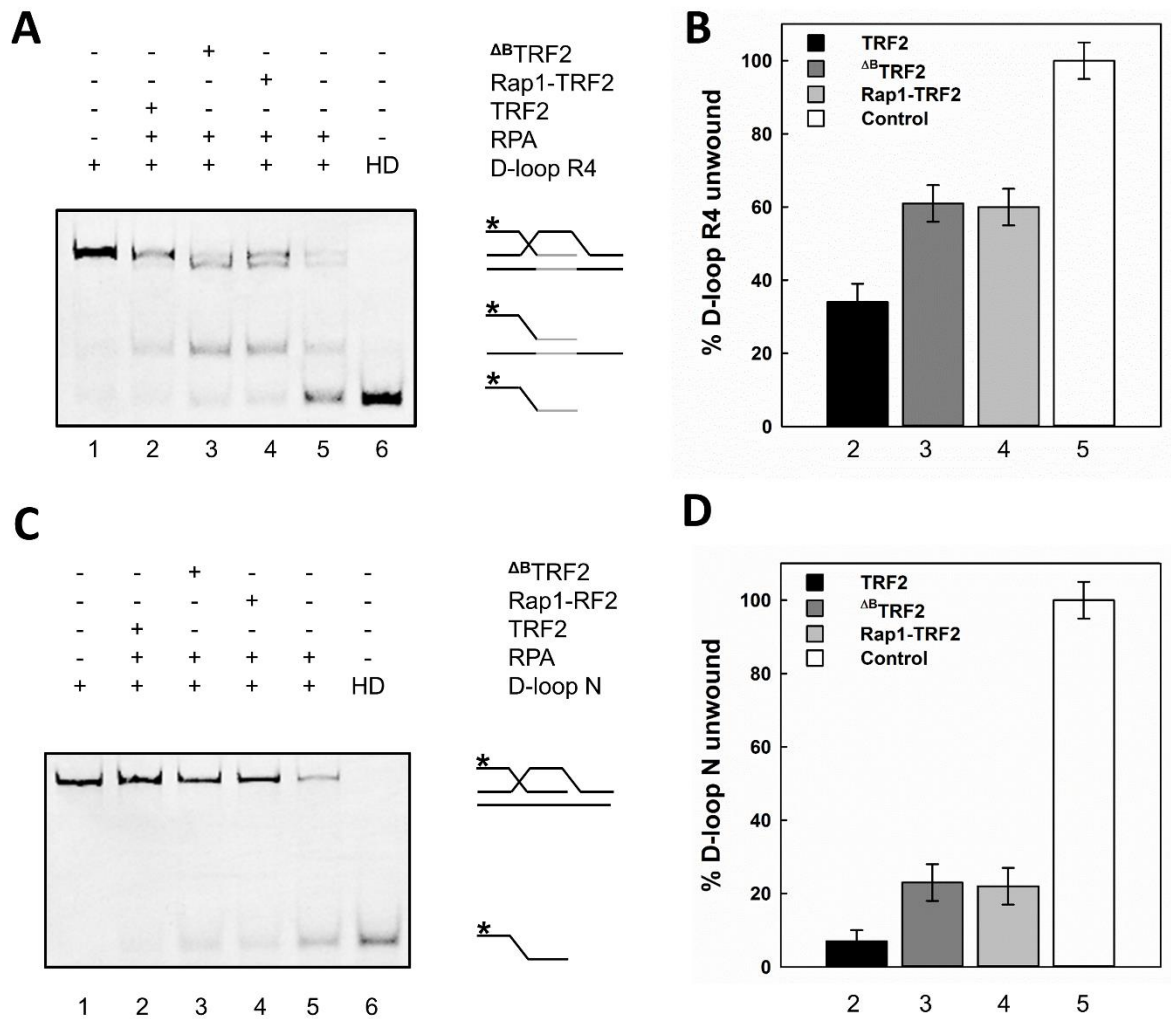

**Figure S2. The B-domain of TRF2 reduces dsDNA unwinding by RPA.** (A) D-loop R4 containing four telomeric repeats or (C) non-telomeric D-loop N was unwound by RPA. Reaction mixtures (10  $\mu$ l) contained D-loop (3 nM) labeled by fluorescein and incubated with RPA (1500 nM; lane 5) and either TRF2,  $\Delta^B$ TRF2 or Rap1-TRF2 complex (750 nM; lanes 2, 3, 4). D-loop only (lane 1); HD heat denatured D-loop (lane 6). An asterisk denotes the fluorescently labeled invasion strand of the D-loop. Telomeric repeats are shown in gray. Products of D-loop unwinding assay were analyzed on a vertical 10% native polyacrylamide gel. (B) The bar graph exhibits the percentage of D-loop R4 unwinding of selected reactions from part A. The lane 5 was assumed as 100 % unwinding which corresponds to the open column denominated as Control. (D) The bar graph demonstrates the percentage of D-loop N unwinding of selected reactions from part C. The error bars represent the mean and standard deviation from three independent experiments.

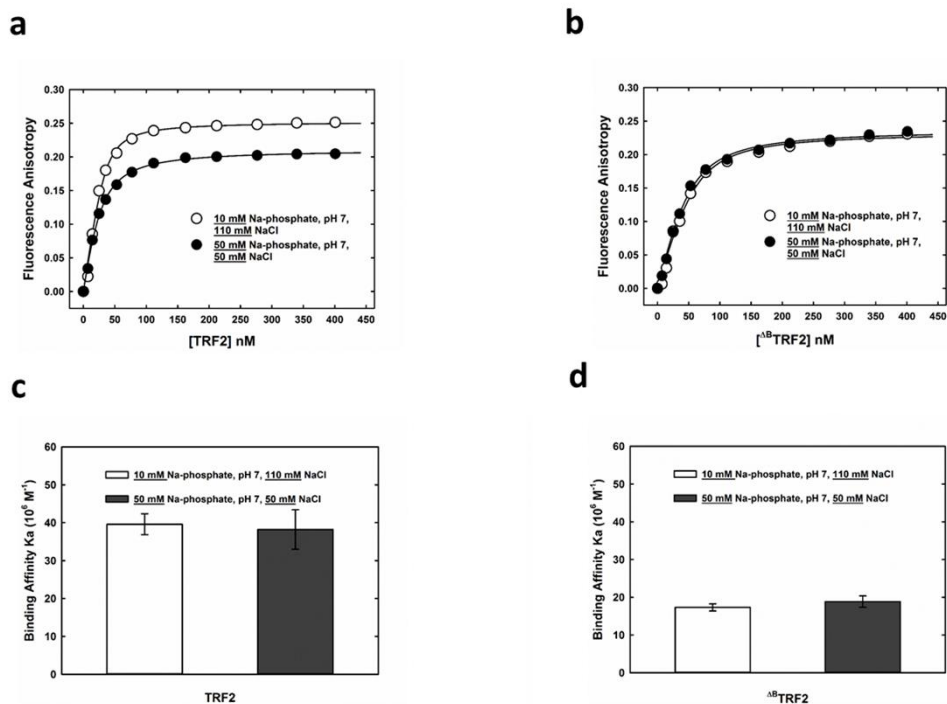

**Figure S3 TRF2 variants show the same binding affinity for telomeric DNA in buffers with different concentrations of sodium phosphate and NaCl.** (a) Binding isotherms of full length TRF2 binding to telomeric DNA duplex R2 measured by fluorescence anisotropy in 10 mM sodium phosphate, pH 7 containing 110 mM NaCl (opened circles) or 50 mM sodium phosphate, pH 7 containing 50 mM NaCl (closed circles). (b) Binding isotherms of  $\Delta^B$ TRF2 binding to telomeric DNA duplex R2 measured by fluorescence anisotropy in 10 mM sodium phosphate, pH 7 containing 110 mM NaCl (opened circles) or 50 mM sodium phosphate, pH 7 containing 50 mM NaCl (closed circles). (c, d) The quantification of binding affinity constants of TRF2 or  $\Delta^B$ TRF2 for telomeric DNA R2 in 10 mM sodium phosphate, pH 7 containing 110 mM NaCl (white bars) or 50 mM sodium phosphate, pH 7 containing 50 mM NaCl (dark grey bars). The comparison of binding affinity revealed that TRF2/ $\Delta^B$ TRF2 binding to telomeric DNA in 10 mM sodium phosphate, pH 7 with 110 mM NaCl is comparable with binding affinity in 50 mM sodium phosphate, pH 7 with 50 mM NaCl. Oligonucleotides in the cuvette (7.5 nM) were labelled by Alexa Fluor® 488. Measurement conditions were the same as described in the Materials and methods.

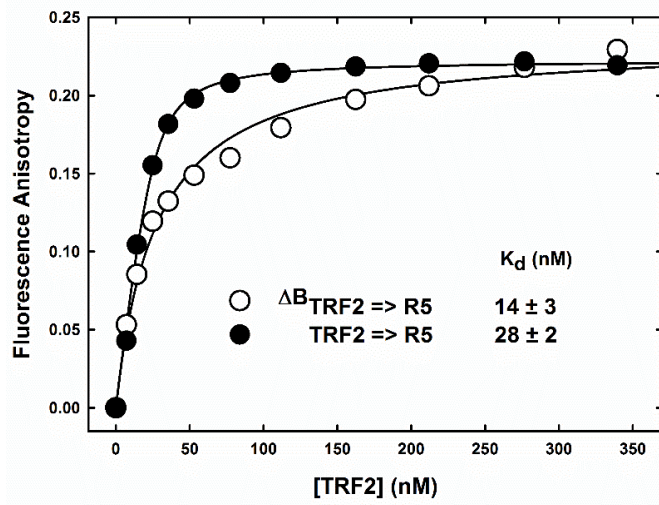

**Figure S4. The B-domain doubles TRF2 binding affinity to telomeric DNA R5 with five telomeric repeats.** TRF2 or  $\Delta^B$ TRF2 (5  $\mu$ M) was titrated to Alexa Fluor 488 labeled DNA duplex (7.5 nM) in 50 mM sodium phosphate, pH 7.0, 50 mM NaCl at 25°C. The binding was monitored by fluorescence anisotropy change (excitation 490 nm, emission 520 nm). Binding isotherms of full length TRF2 (closed circles) and truncated  $\Delta^B$ TRF2 (open circles) binding to telomeric DNA duplex R5 are shown together with the corresponding  $K_d$  values and standard deviation error of three independent measurements.
